# Supplementary material
Source: PubMed Central journal article supplement (PMC4423367)
Supplement: 10.1534_115.174748_genetics.115.174748-2.pdf [file 10.1534_115.174748_genetics.115.174748-2.pdf]

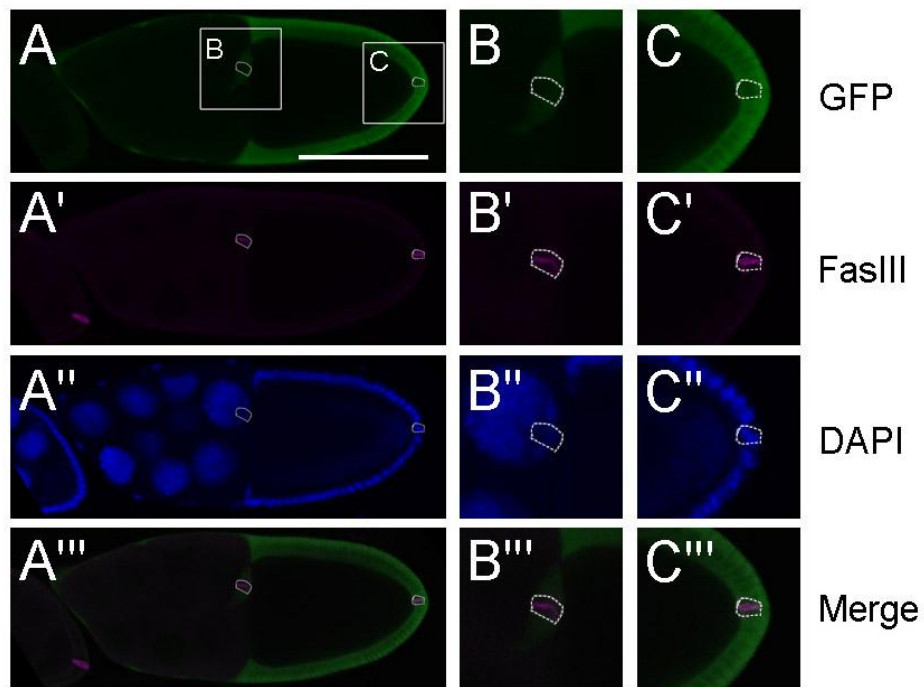

**Figure S4** miR-318 is not expressed in the polar cells. (A-A''') miR-318 is not detected in two central polar cells within the border cell cluster (B-B''', Higher magnification) and the posterior polar cells (C-C''', Higher magnification). Shown are confocal images of egg chambers from *miR-318<sup>A1/+</sup>* heterozygous females, stained with anti-GFP (Green), anti-FasIII (Purple) and DAPI (Blue). Scale bar: 100um.
