# Supplementary material
Source: PubMed Central journal article supplement (PMC4423367)
Supplement: 10.1534_115.174748_genetics.115.174748-3.pdf [file 10.1534_115.174748_genetics.115.174748-3.pdf]

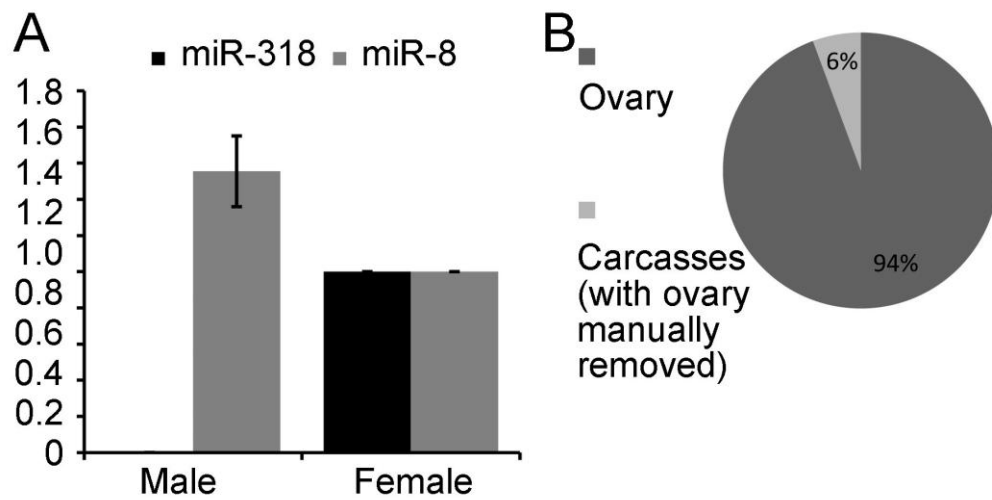

**Figure S3** miR-318 is expressed in *Drosophila* ovaries. (A) miR-318 is only expressed in female adults. Mature miR-318 levels were measured by miRNA quantitative RT-PCR in RNAs isolated from adult males and females. miR-8 served as a control miRNA that is expressed in both adult males and females. miRNA expression levels were normalized to miR-184. Error bars represent standard deviation from three independent experiments. (B) miR-318 is enriched in ovaries. Mature miR-318 levels were measured by miRNA quantitative RT-PCR in RNAs extracted from ovaries and the rest part of the female body. miRNA levels were normalized to miR-184. Note the small fraction of miR-318 in carcasses is likely due to incomplete dissection of ovaries.
