# Supplementary material
Source: PubMed Central journal article supplement (PMC4423367)
Supplement: 10.1534_115.174748_genetics.115.174748-4.pdf [file 10.1534_115.174748_genetics.115.174748-4.pdf]

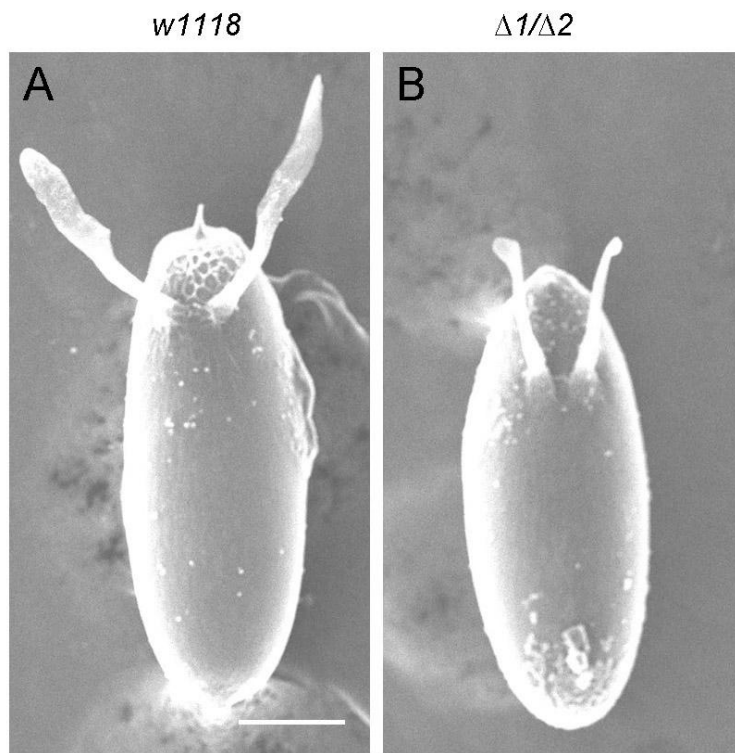

**Figure S2** Characterization of miR-318 mutants. (A, B) miR-318 maternal loss-of-function mutants lay eggs with abnormal morphology. Eggs laid by control and miR-318 mutant females were visualized by scanning electron microscopy. Eggs are presented in a dorsal view, with anterior to the upper side. Scale bar: 100  $\mu$ m.
