# Supplementary material
Source: PubMed Central journal article supplement (PMC4423367)
Supplement: 10.1534_115.174748_genetics.115.174748-5.pdf [file 10.1534_115.174748_genetics.115.174748-5.pdf]

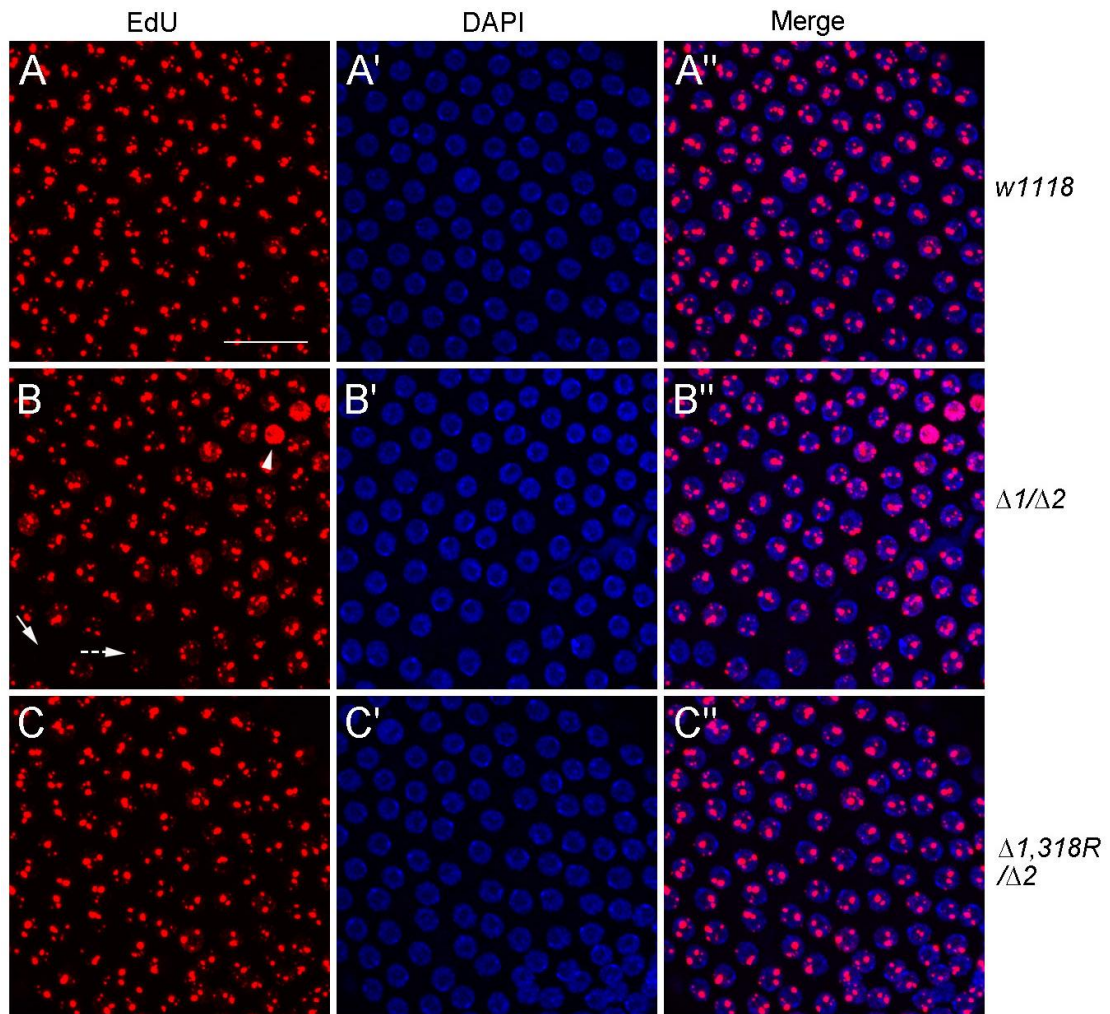

**Figure S6** miR-318 mutation causes gene amplification defects. (A-C'') The EdU incorporation pattern is abnormal in miR-318 mutants. Shown are maximum intensity projections of Z-stacks of confocal images with higher magnification of stage 10B egg chambers from females of indicated genotypes. Samples were labeled with EdU (Red) and DAPI (Blue). EdU incorporation throughout the nucleus (Arrowhead in B), reduced EdU incorporation (Dotted arrow in B) and absent EdU incorporation (Arrow in B). Scale bar: 10  $\mu$ m.
