# Supplementary material
Source: PubMed Central journal article supplement (PMC4423367)
Supplement: 10.1534_115.174748_genetics.115.174748-6.pdf [file 10.1534_115.174748_genetics.115.174748-6.pdf]

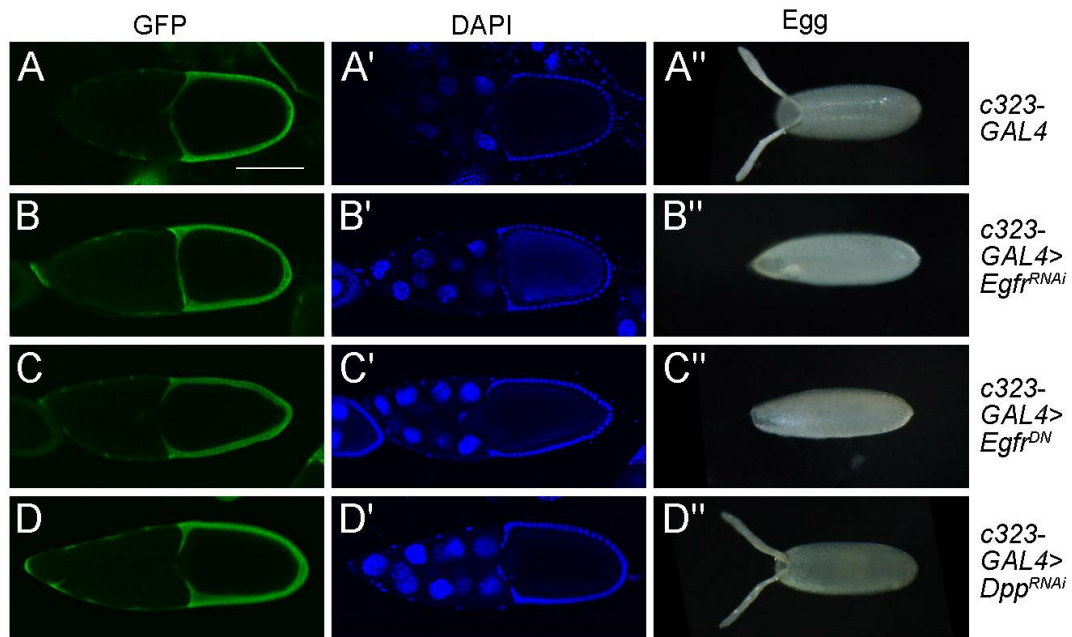

**Figure S5** EGFR and Dpp pathways are not required for miR-318 expression. (A-D'') Depletion of EGFR or Dpp does not affect miR-318 expression. Shown are confocal images of stage 10B egg chambers from *miR-318<sup>Δ1/+</sup>* female flies expressing UAS-*Egfr<sup>RNAi</sup>*, UAS-*Egfr<sup>DN</sup>* or *Dpp<sup>RNAi</sup>* transgenes under the control of *c323-GAL4*, stained with anti-GFP (Green) and DAPI (Blue). Phase contrast images of dorsal views of eggs from female flies of indicated genotypes are shown in the right panels (A''-D''). Note the abnormal dorsal appendages caused by depletion of EGFR or Dpp. Scale bar: 100  $\mu$ m.
