# Supplementary material
Source: PubMed Central journal article supplement (PMC4423367)
Supplement: 10.1534_115.174748_genetics.115.174748-7.pdf [file 10.1534_115.174748_genetics.115.174748-7.pdf]

dme-miR-318-3p **UCACUGGG**CUUUGUUUAUCUCA  
dme-miR-309-3p **GCACUGGG**UAAAGUUUGUCCUA  
dme-miR-3-3p **UCACUGGG**CAAAGUGUGUCA

**Figure S1** *Drosophila* miR-3 family miRNAs. Sequence alignment of *Drosophila* miR-3 family miRNAs. The nucleotides in the seed region are shown in bold.
